# Supplementary material
Source: PubMed Central journal article supplement (PMC9345574)

Source Data for Figure 3.

Full Blots

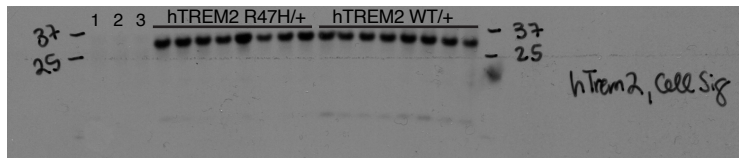

1 = mTrem2 KO  
2-3 = mTrem2+/+

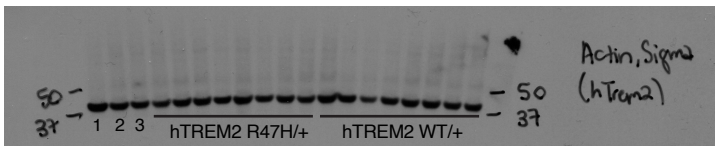

Supplement: NIHMS1824808-supplement-Data_File_S1.pdf [file NIHMS1824808-supplement-Data_File_S1.pdf]
