# Supplementary material
Source: PubMed Central journal article supplement (PMC9345574)

\_RIPA Lysate\_WB\_Akt Blot\_100 sec

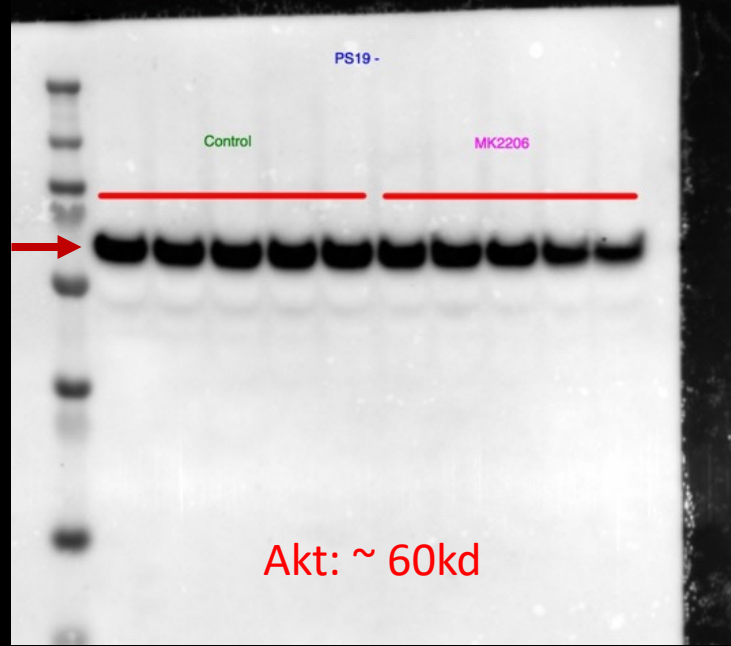

p\_RIPA Lysate\_WB\_pAkt\_200 sec

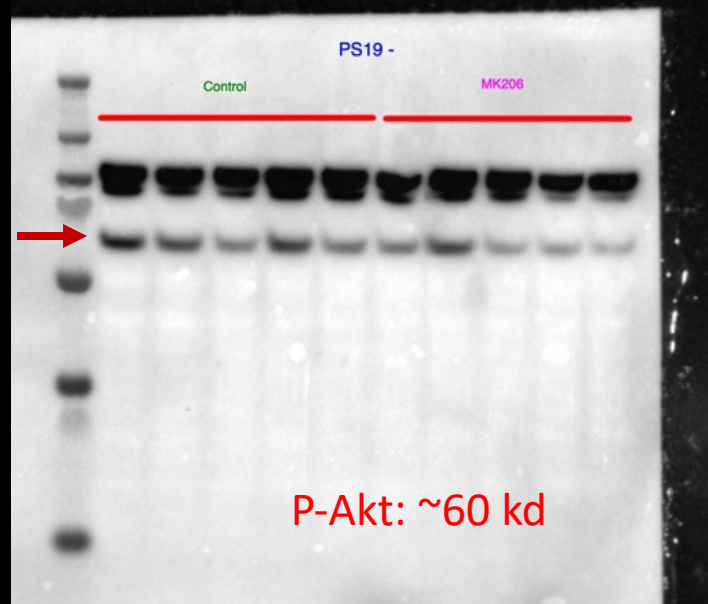

\_RIPA Lysate\_WB\_Actin of pAkt\_20 sec

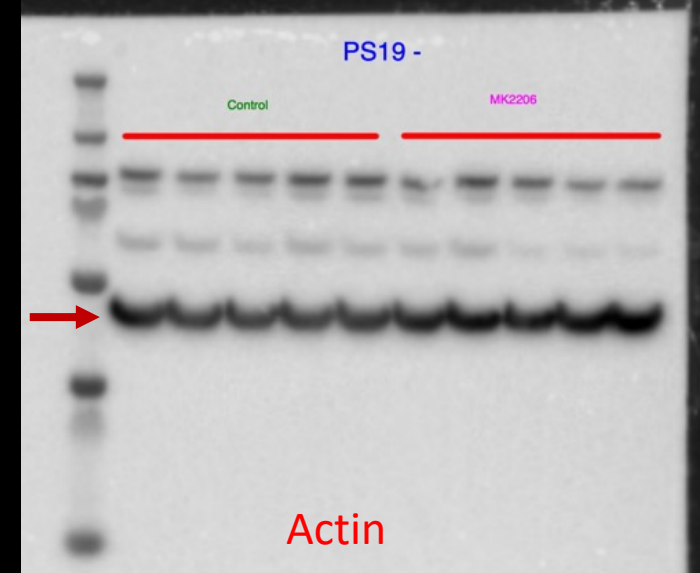

## Source Data for Figure 6 C-D:

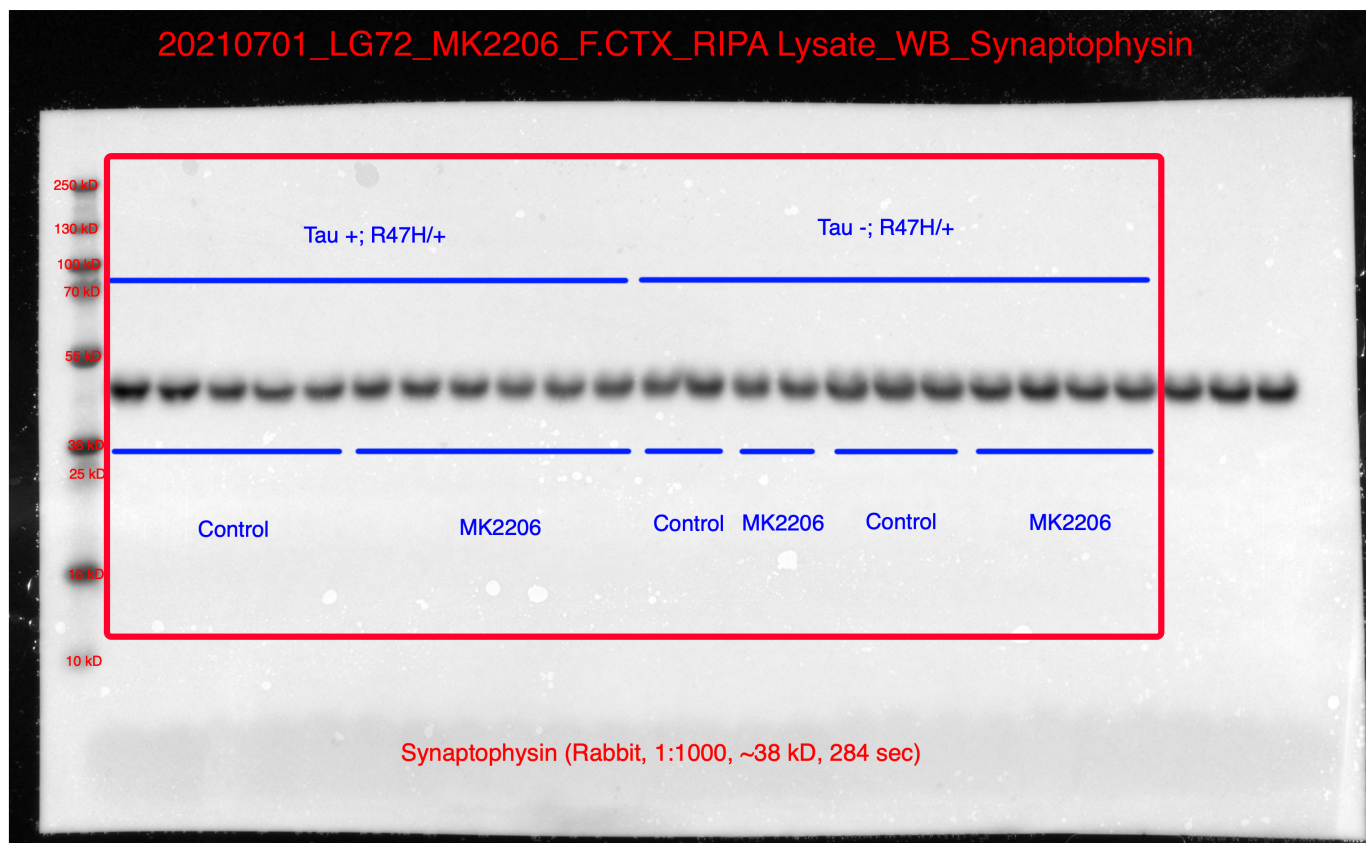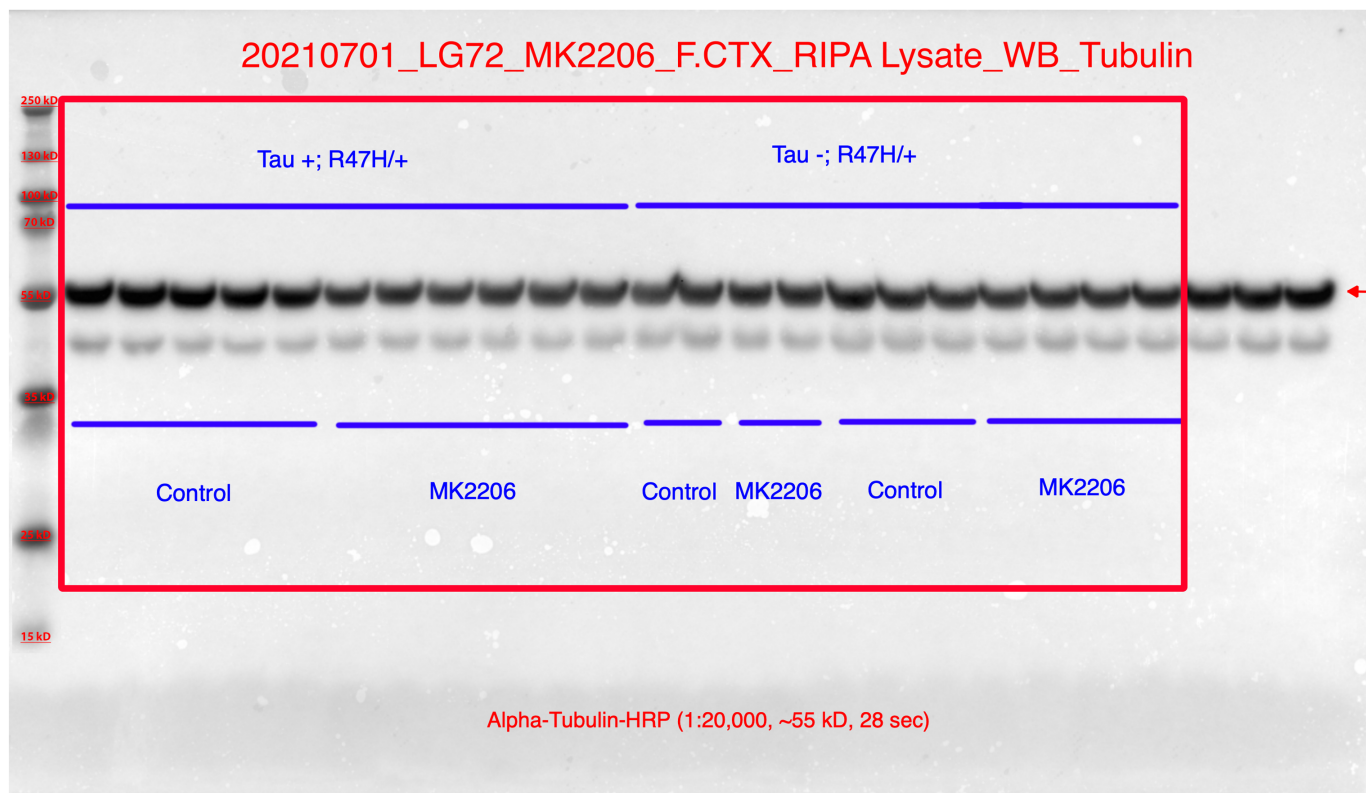

Supplement: NIHMS1824808-supplement-Data_File_S2.pdf [file NIHMS1824808-supplement-Data_File_S2.pdf]
